# Supplementary material for: Design and synthesis of new bicyclic diketopiperazines as scaffolds for receptor probes of structurally diverse functionality
Source: Royal Society of Chemistry journal article supplement (doi:10.1039/b416349d), 2005-01-01
Supplement: b416349d.pdf [file b416349d.pdf]

TITLE TWO DIFFERENT CONFORMATIONS OF COMPOUND 20  
COMPND MOL\_ID: 1;  
COMPND 2 MOLECULE: (1S,8S)-11-(2,4-Dimethoxy-benzyl)-3-oxa-9,11-diaza-  
bicyclo[6.2.2]dodec-5-ene-10,12-dione (16)  
COMPND MOL\_ID: 2;  
COMPND 2 MOLECULE: (1S,8S)-11-(2,4-Dimethoxy-benzyl)-3-oxa-9,11-diaza-  
bicyclo[6.2.2]dodec-5-ene-10,12-dione (16)  
EXPDTA THEORETICAL MODEL  
AUTHOR STEFANO COSTANZI  
AUTHOR 2 SCOSTANZ@HELIX.NIH.GOV  
JRNL AUTH P. BESADA, L.MAMEDOVA, C.J. THOMAS, S.COSTANZI,K.A.JACOBSON  
JRNL TITL DESIGN AND SYNTHESIS OF NEW BICYCLIC DIKETOPIPERAZINES AS  
SCAFFOLDS  
JRNL TITL 2 FOR RECEPTOR PROBES OF STRUCTURALLY DIVERSE FUNCTIONALITY  
JRNL REF ORGANIC & BIOMOLECULAR CHEMISTRY

|        |    |     |     |   |         |        |        |      |      |
|--------|----|-----|-----|---|---------|--------|--------|------|------|
| HETATM | 1  | N   | MOL | 1 | -4.968  | -0.419 | -1.350 | 1.00 | 0.00 |
| HETATM | 2  | C   | MOL | 1 | -4.808  | 0.941  | -1.509 | 1.00 | 0.00 |
| HETATM | 3  | O   | MOL | 1 | -4.157  | 1.400  | -2.444 | 1.00 | 0.00 |
| HETATM | 4  | C1  | MOL | 1 | -5.490  | 1.882  | -0.476 | 1.00 | 0.00 |
| HETATM | 5  | C2  | MOL | 1 | -4.418  | 2.436  | 0.492  | 1.00 | 0.00 |
| HETATM | 6  | N1  | MOL | 1 | -6.717  | 1.238  | 0.107  | 1.00 | 0.00 |
| HETATM | 7  | C3  | MOL | 1 | -7.841  | 2.119  | 0.495  | 1.00 | 0.00 |
| HETATM | 8  | C4  | MOL | 1 | -6.870  | -0.142 | 0.153  | 1.00 | 0.00 |
| HETATM | 9  | O1  | MOL | 1 | -7.915  | -0.693 | 0.500  | 1.00 | 0.00 |
| HETATM | 10 | C5  | MOL | 1 | -5.631  | -1.035 | -0.201 | 1.00 | 0.00 |
| HETATM | 11 | C6  | MOL | 1 | -4.831  | -1.271 | 1.110  | 1.00 | 0.00 |
| HETATM | 12 | C7  | MOL | 1 | -3.342  | -1.511 | 0.929  | 1.00 | 0.00 |
| HETATM | 13 | C8  | MOL | 1 | -2.372  | -0.587 | 0.808  | 1.00 | 0.00 |
| HETATM | 14 | C9  | MOL | 1 | -2.482  | 0.925  | 0.756  | 1.00 | 0.00 |
| HETATM | 15 | O2  | MOL | 1 | -3.700  | 1.486  | 1.291  | 1.00 | 0.00 |
| HETATM | 16 | C10 | MOL | 1 | -8.651  | 2.666  | -0.667 | 1.00 | 0.00 |
| HETATM | 17 | C11 | MOL | 1 | -8.485  | 3.974  | -1.165 | 1.00 | 0.00 |
| HETATM | 18 | O3  | MOL | 1 | -7.537  | 4.806  | -0.558 | 1.00 | 0.00 |
| HETATM | 19 | C12 | MOL | 1 | -7.272  | 6.094  | -1.104 | 1.00 | 0.00 |
| HETATM | 20 | C13 | MOL | 1 | -9.261  | 4.410  | -2.240 | 1.00 | 0.00 |
| HETATM | 21 | C14 | MOL | 1 | -10.206 | 3.574  | -2.844 | 1.00 | 0.00 |
| HETATM | 22 | O4  | MOL | 1 | -11.002 | 3.952  | -3.915 | 1.00 | 0.00 |
| HETATM | 23 | C15 | MOL | 1 | -10.848 | 5.260  | -4.458 | 1.00 | 0.00 |
| HETATM | 24 | C16 | MOL | 1 | -10.361 | 2.280  | -2.341 | 1.00 | 0.00 |
| HETATM | 25 | C17 | MOL | 1 | -9.593  | 1.852  | -1.276 | 1.00 | 0.00 |
| HETATM | 26 | N   | MOL | 2 | -4.998  | -0.428 | -1.371 | 1.00 | 0.00 |
| HETATM | 27 | C   | MOL | 2 | -4.849  | 0.934  | -1.537 | 1.00 | 0.00 |
| HETATM | 28 | O   | MOL | 2 | -4.249  | 1.397  | -2.501 | 1.00 | 0.00 |
| HETATM | 29 | C1  | MOL | 2 | -5.491  | 1.877  | -0.475 | 1.00 | 0.00 |
| HETATM | 30 | C2  | MOL | 2 | -4.375  | 2.401  | 0.463  | 1.00 | 0.00 |
| HETATM | 31 | N1  | MOL | 2 | -6.722  | 1.249  | 0.108  | 1.00 | 0.00 |
| HETATM | 32 | C3  | MOL | 2 | -7.848  | 2.134  | 0.477  | 1.00 | 0.00 |
| HETATM | 33 | C4  | MOL | 2 | -6.846  | -0.131 | 0.212  | 1.00 | 0.00 |
| HETATM | 34 | O1  | MOL | 2 | -7.874  | -0.687 | 0.600  | 1.00 | 0.00 |
| HETATM | 35 | C5  | MOL | 2 | -5.626  | -1.041 | -0.203 | 1.00 | 0.00 |
| HETATM | 36 | C6  | MOL | 2 | -4.716  | -1.385 | 1.021  | 1.00 | 0.00 |
| HETATM | 37 | C7  | MOL | 2 | -5.237  | -0.828 | 2.334  | 1.00 | 0.00 |
| HETATM | 38 | C8  | MOL | 2 | -4.829  | 0.283  | 2.967  | 1.00 | 0.00 |
| HETATM | 39 | C9  | MOL | 2 | -3.741  | 1.249  | 2.549  | 1.00 | 0.00 |
| HETATM | 40 | O2  | MOL | 2 | -3.585  | 1.407  | 1.127  | 1.00 | 0.00 |
| HETATM | 41 | C10 | MOL | 2 | -7.605  | 3.029  | 1.680  | 1.00 | 0.00 |
| HETATM | 42 | C11 | MOL | 2 | -7.750  | 2.570  | 3.005  | 1.00 | 0.00 |
| HETATM | 43 | O3  | MOL | 2 | -8.145  | 1.246  | 3.213  | 1.00 | 0.00 |
| HETATM | 44 | C12 | MOL | 2 | -8.475  | 0.799  | 4.525  | 1.00 | 0.00 |
| HETATM | 45 | C13 | MOL | 2 | -7.494  | 3.434  | 4.071  | 1.00 | 0.00 |
| HETATM | 46 | C14 | MOL | 2 | -7.106  | 4.759  | 3.857  | 1.00 | 0.00 |
| HETATM | 47 | O4  | MOL | 2 | -6.834  | 5.662  | 4.873  | 1.00 | 0.00 |
| HETATM | 48 | C15 | MOL | 2 | -6.945  | 5.225  | 6.225  | 1.00 | 0.00 |
